# Supplementary material
Source: PubMed Central journal article supplement (PMC7002219)
Supplement: NIHMS1541235-supplement-2.pdf [file NIHMS1541235-supplement-2.pdf]

**A.**

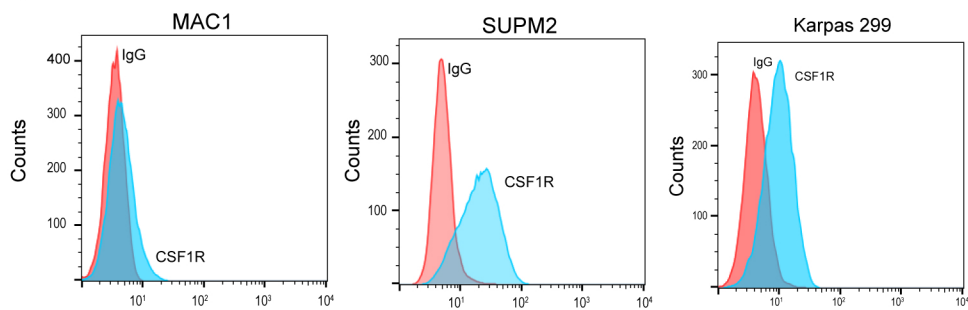

**B.**

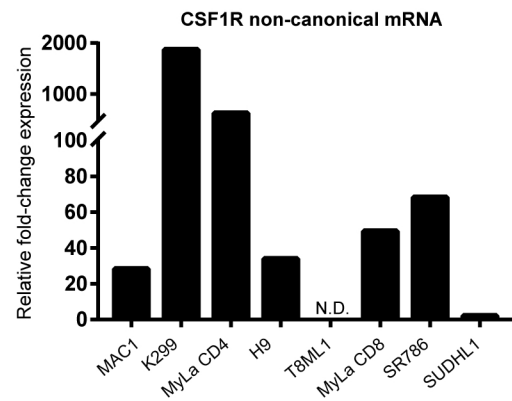

**C.**

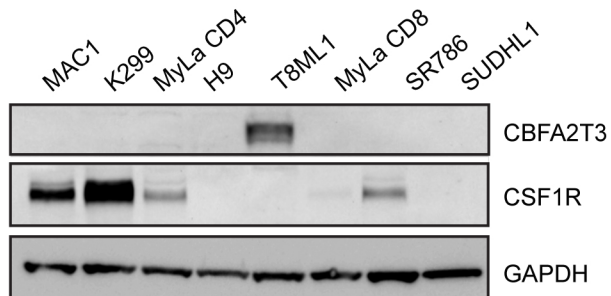

**D.**

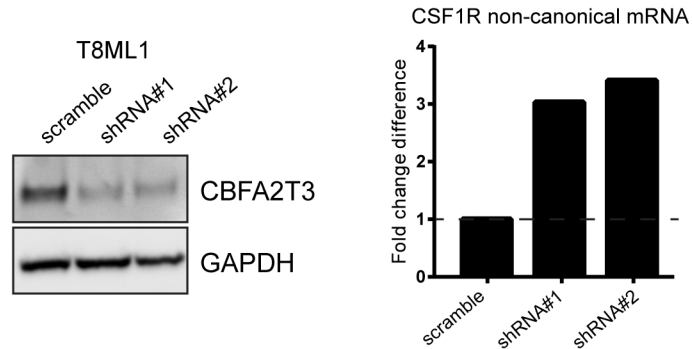

**E.**

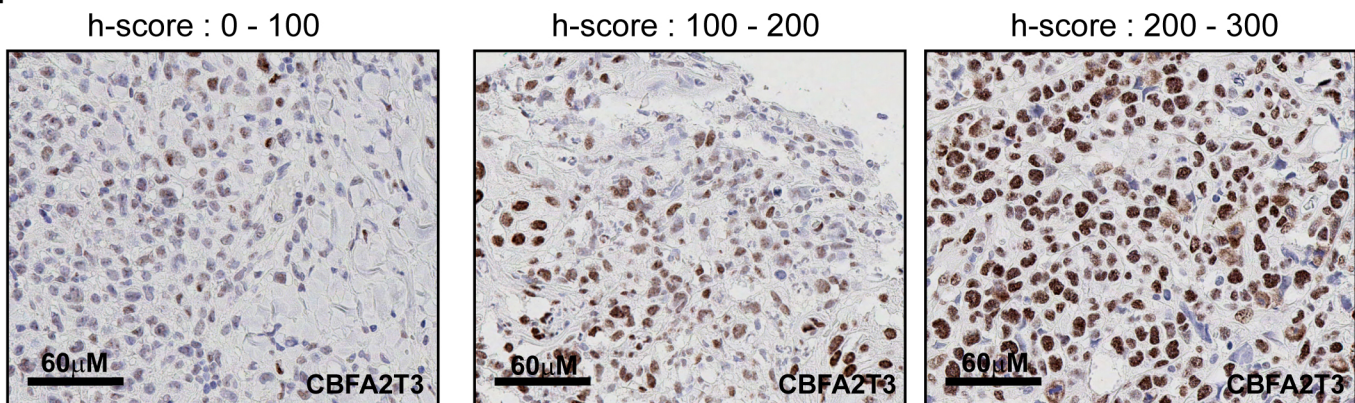

**F.**

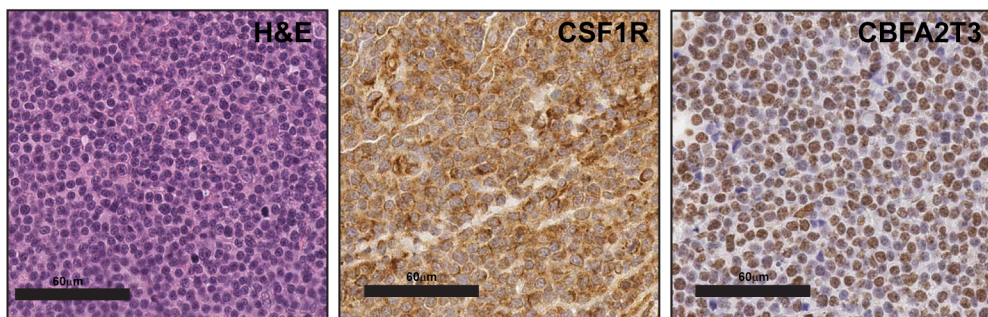

**G.**

|       |          | CBFA2T3 |          |          |       |       | CBFA2T3  |        |          |          |       | CBFA2T3  |    |           |          |          |       |
|-------|----------|---------|----------|----------|-------|-------|----------|--------|----------|----------|-------|----------|----|-----------|----------|----------|-------|
|       |          | ALCL    | positive | negative | total |       |          | ENKTCL | positive | negative | total |          |    | PTCL, NOS | positive | negative | total |
| CSF1R | positive |         | 5        | 0        | 5     | CSF1R | positive | 3      | 0        | 3        | CSF1R | positive | 1  | 0         | 1        |          |       |
|       | negative |         | 3        | 0        | 3     |       | negative | 2      | 0        | 2        |       | negative | 12 | 1         | 12       |          |       |
|       | total    |         |          |          | 8     |       | total    |        |          | 5        |       | total    |    |           | 13       |          |       |
|       |          |         |          | CBFA2T3  |       |       |          |        | CBFA2T3  |          |       |          |    | CBFA2T3   |          |          |       |
|       |          | CTCL    | positive | negative | total |       |          |        |          |          |       |          |    |           |          |          |       |
| CSF1R | positive |         | 7        | 14       | 21    |       |          |        |          |          |       |          |    |           |          |          |       |
|       | negative |         | 2        | 6        | 8     |       |          |        |          |          |       |          |    |           |          |          |       |
|       | total    |         | 9        | 20       | 29    |       |          |        |          |          |       |          |    |           |          |          |       |
