# Supplementary material
Source: PubMed Central journal article supplement (PMC7002219)

A.

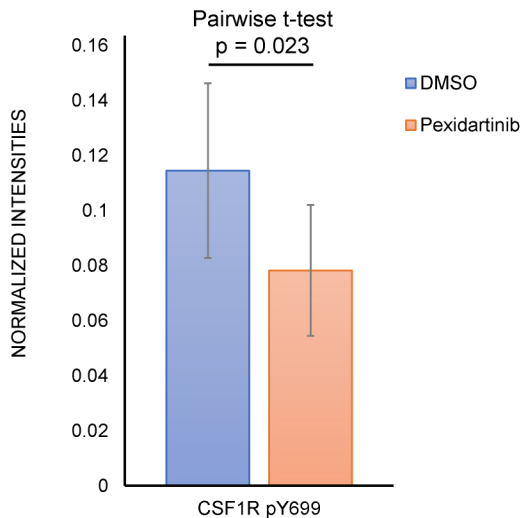

B.

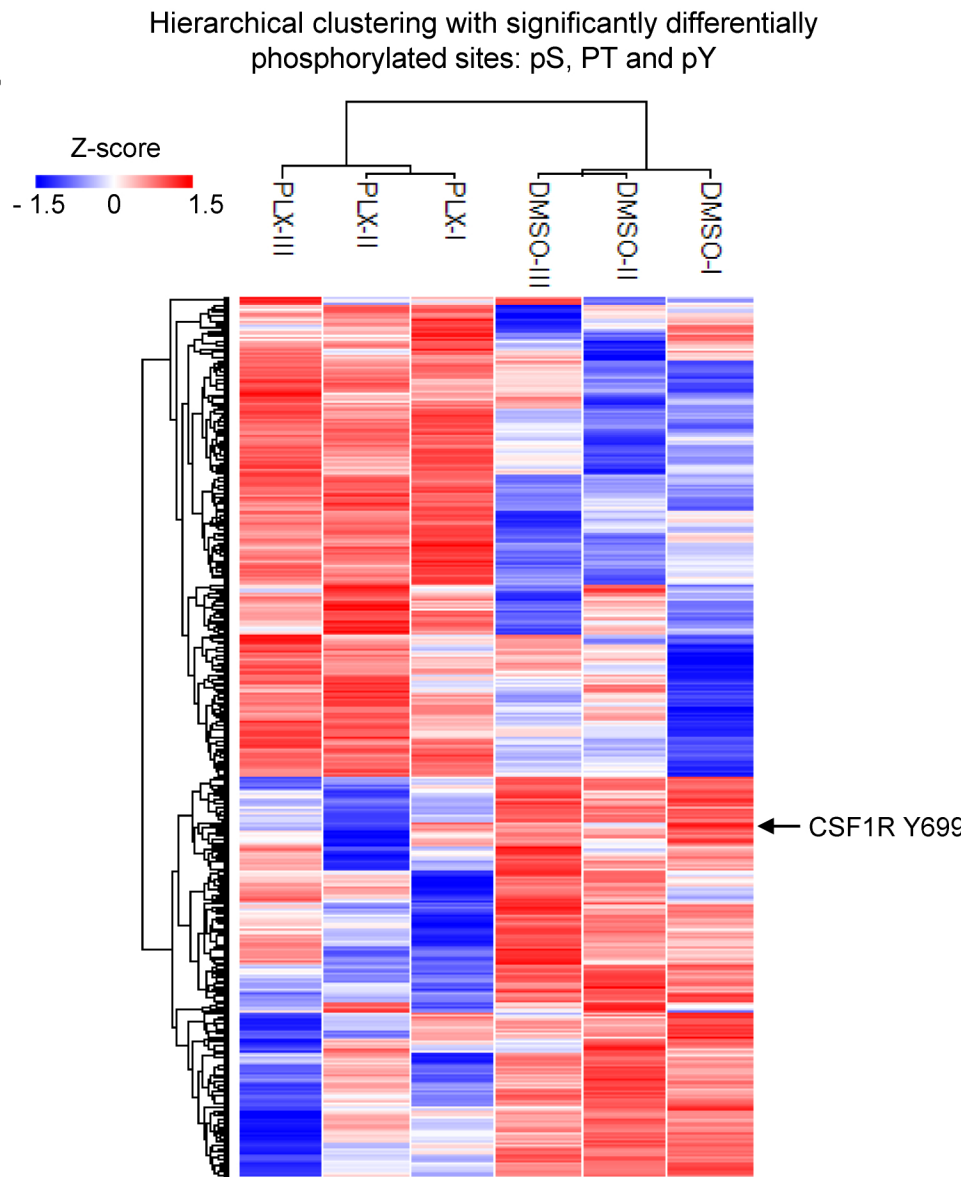

C.

DAVID analysis (KEGG pathways) based on the 551 proteins with at least one significantly (pairwise t-test) differentially phosphorylated sites

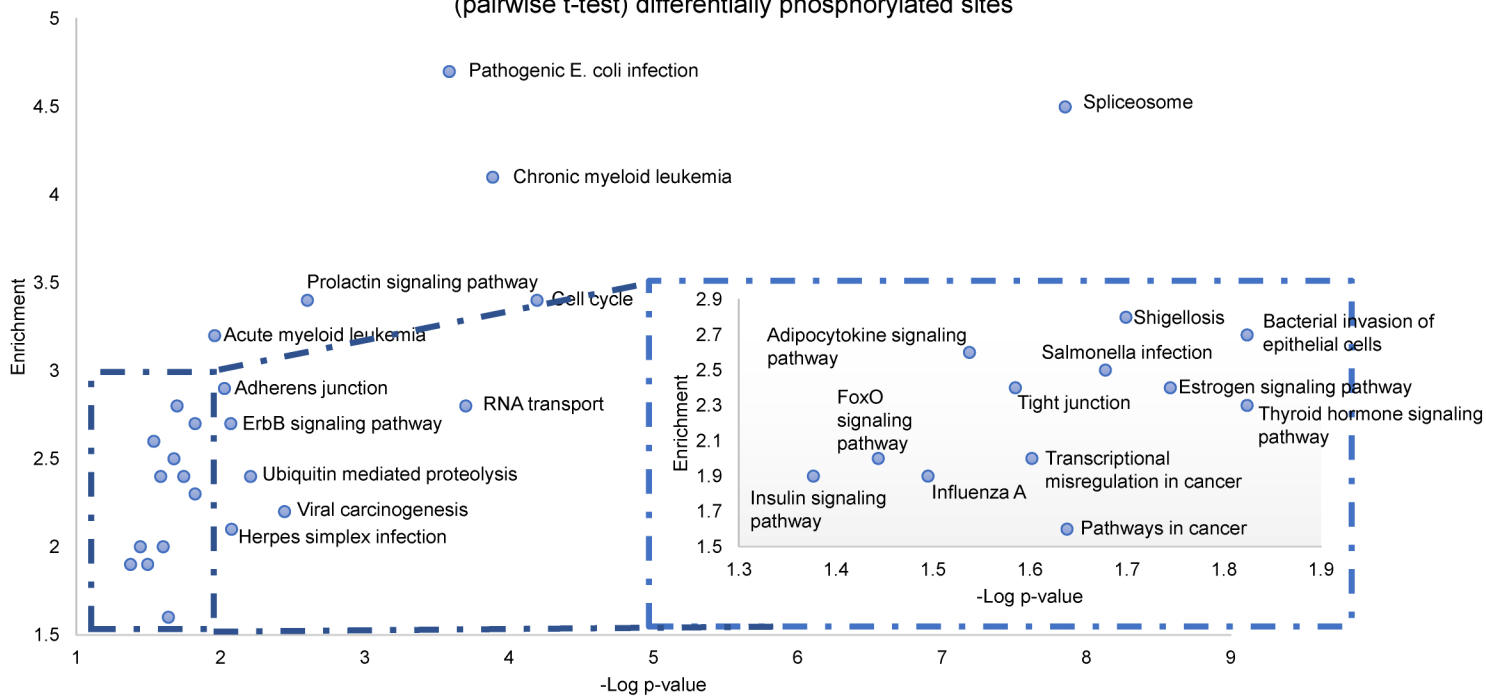

Supplement: NIHMS1541235-supplement-5.pdf [file NIHMS1541235-supplement-5.pdf]
