# Supplementary material
Source: PubMed Central journal article supplement (PMC7002219)

Supplementary Figure 1

A.

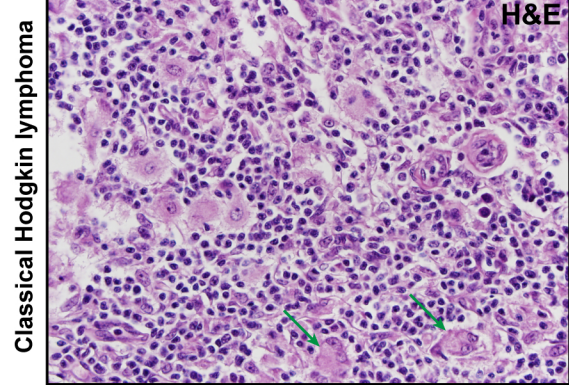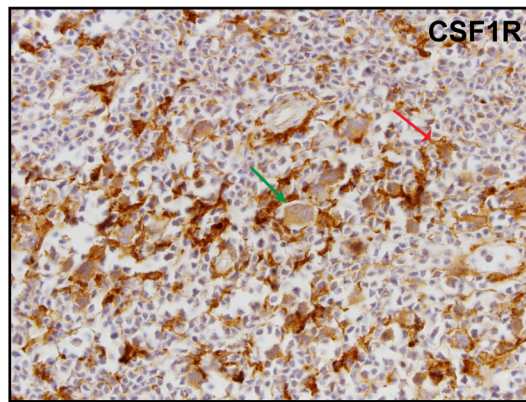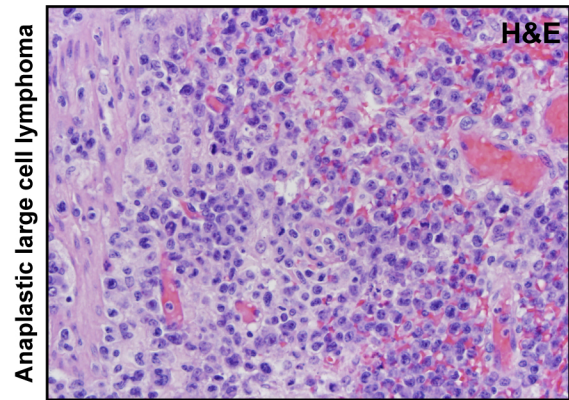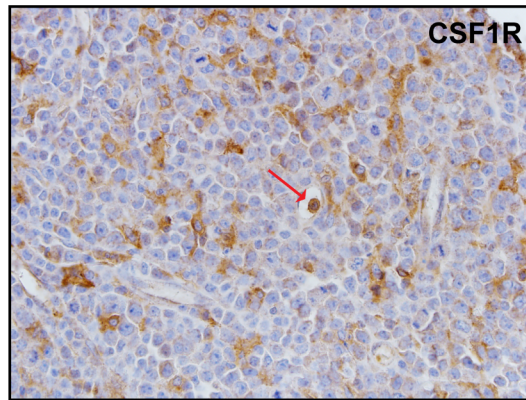

B.

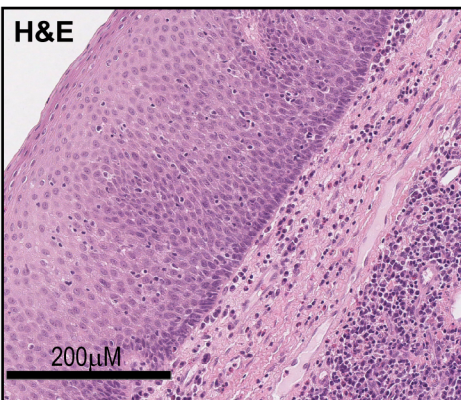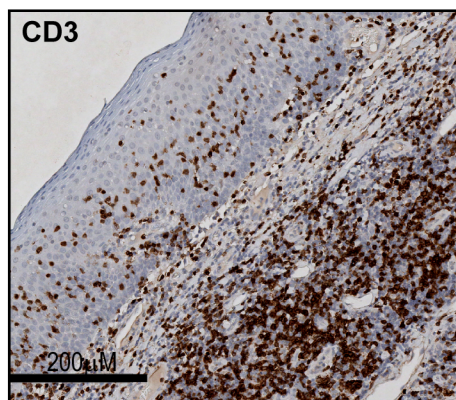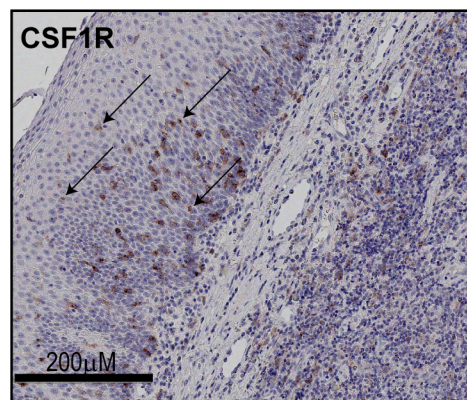

C.

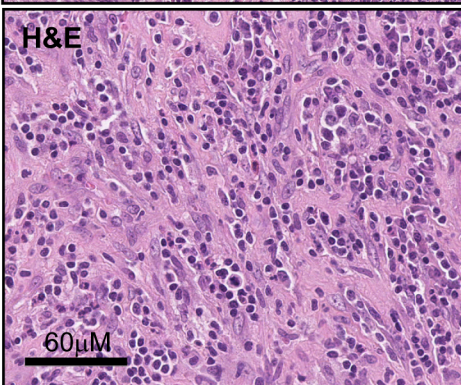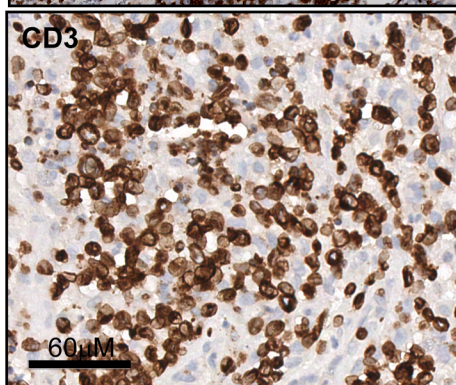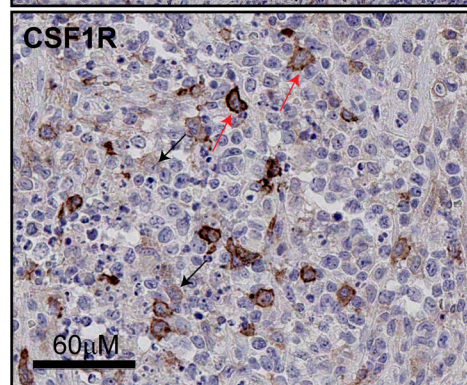

D.

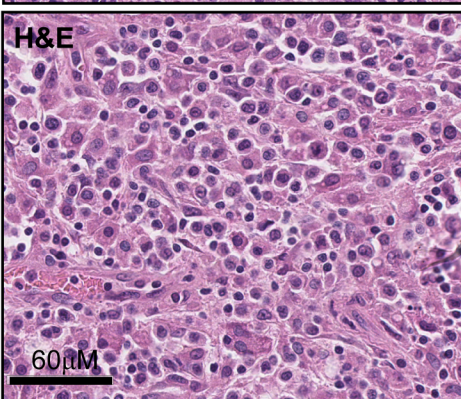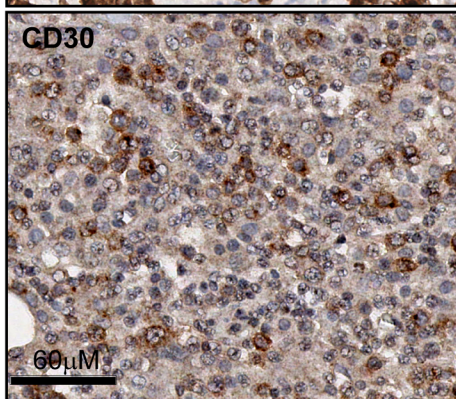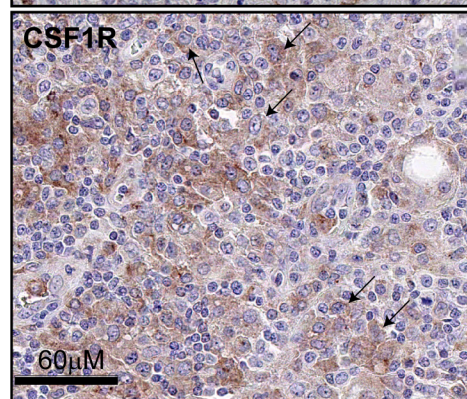

Supplement: NIHMS1541235-supplement-1.pdf [file NIHMS1541235-supplement-1.pdf]

# Supplementary Figure 3

**A.**

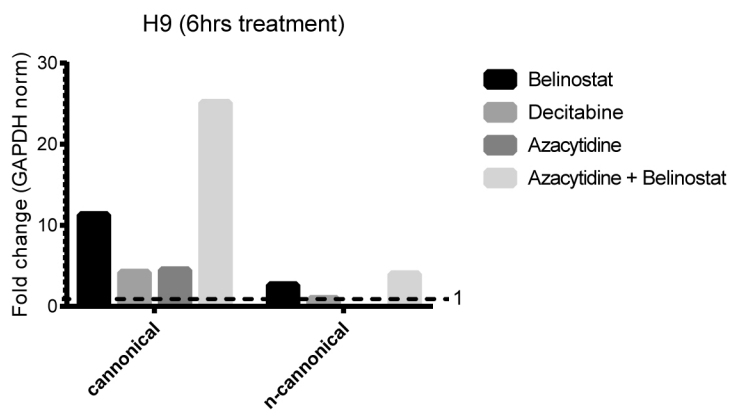

**B.**

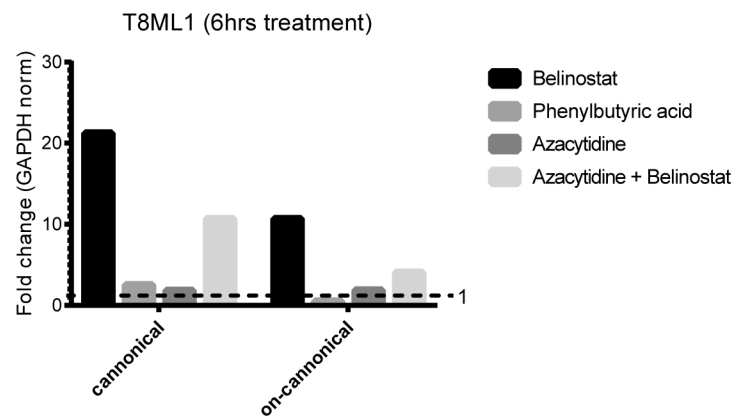

**C.**

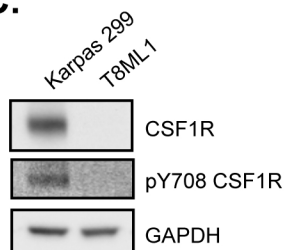

**D.**

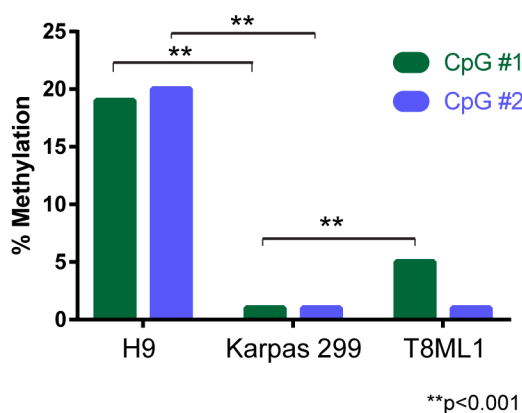

**E.**

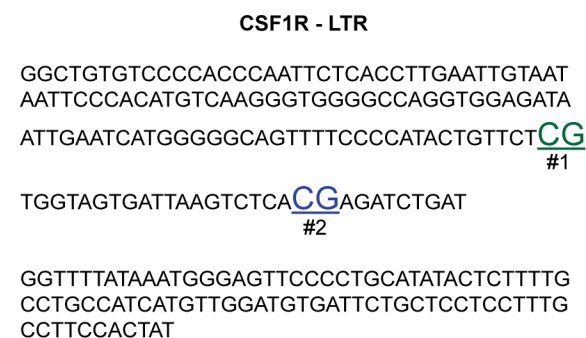

**F.**

## CSF1 ligand mRNA levels

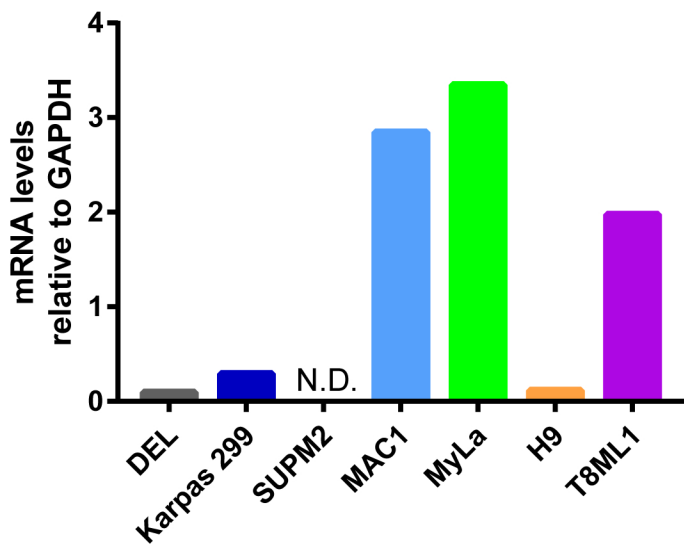

**G.**

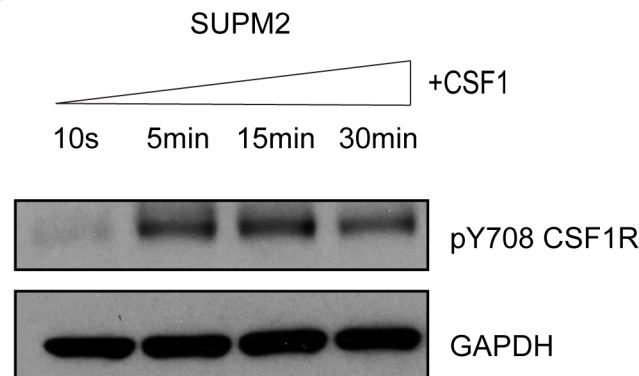

Supplement: NIHMS1541235-supplement-3.pdf [file NIHMS1541235-supplement-3.pdf]

**A.**

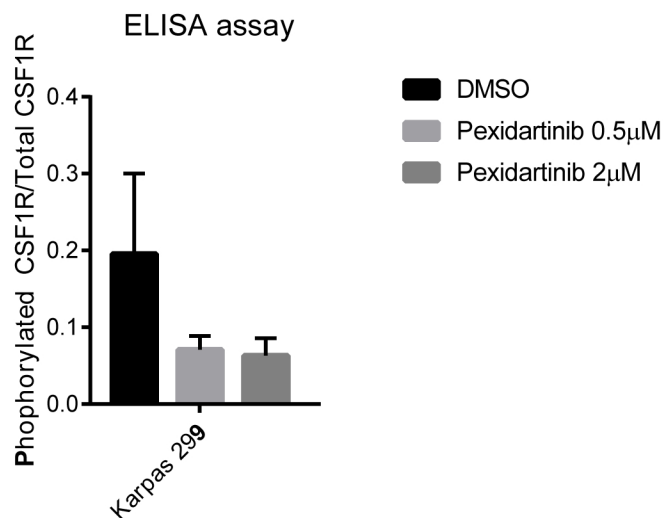

**B.**

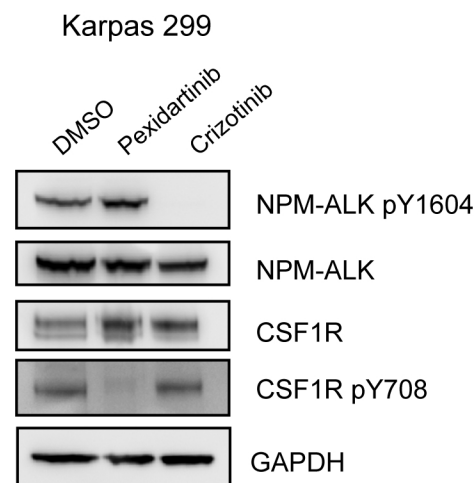

**C.**

T-cell lymphoma lines (48hrs incubation)

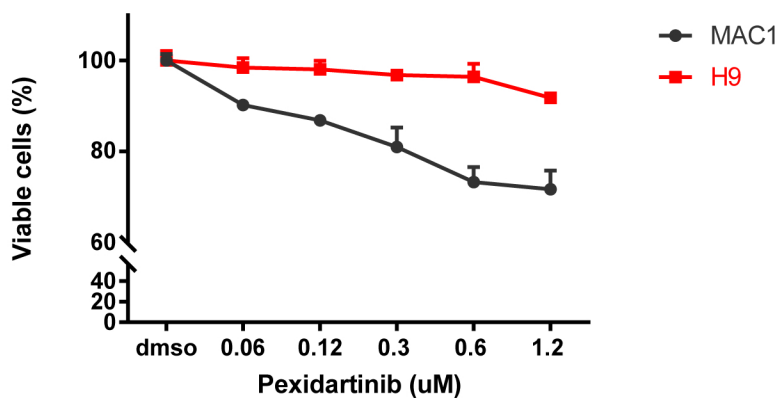

**D.**

MyLa CD4 48hrs

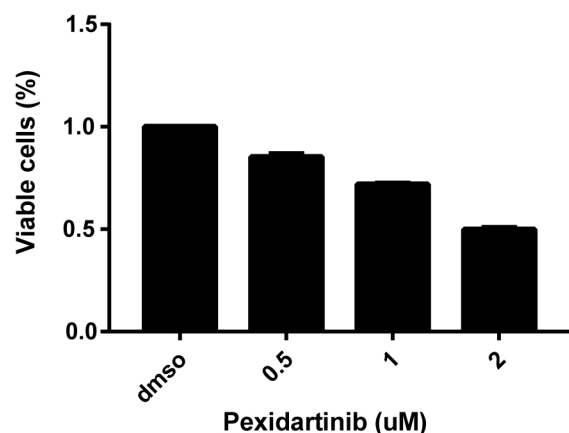

**E.**

MyLa CD8 48hrs

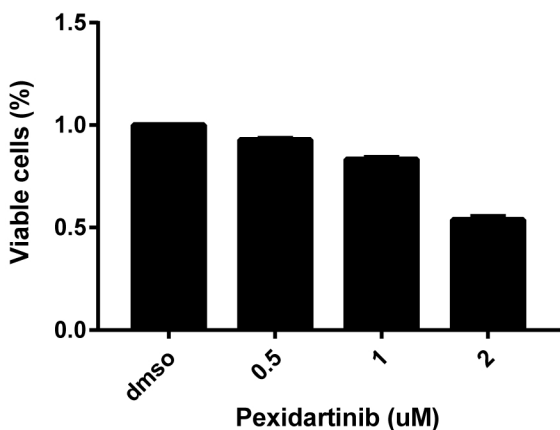

**F.**

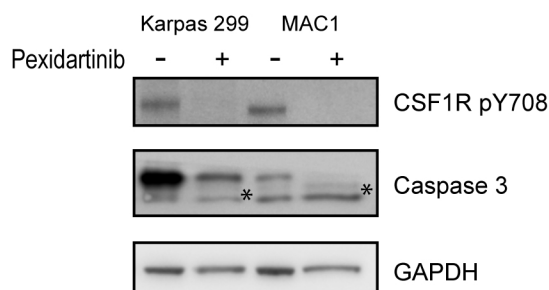

Supplement: NIHMS1541235-supplement-4.pdf [file NIHMS1541235-supplement-4.pdf]

**A.**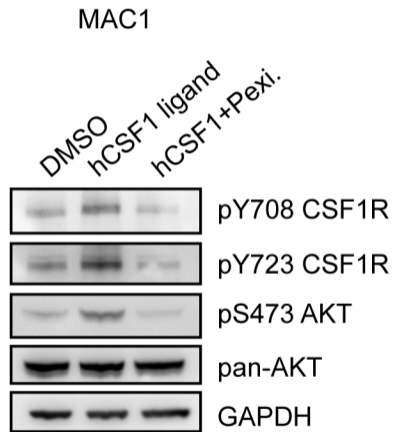**B.**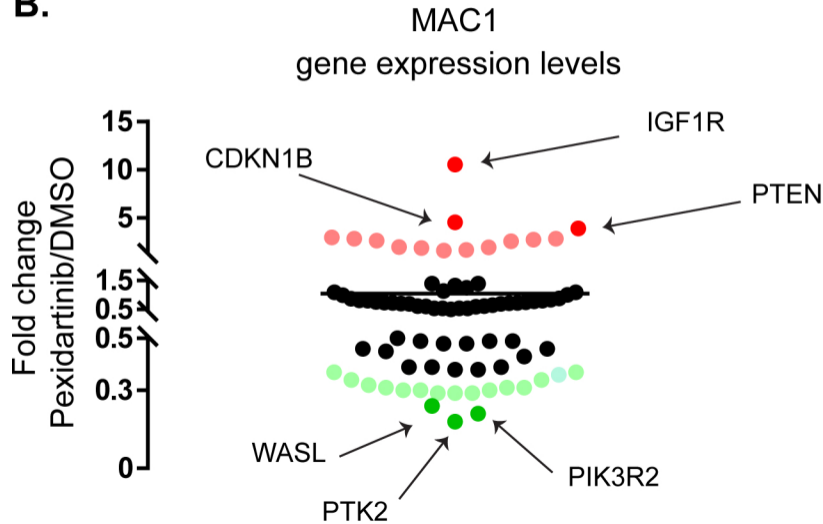

Supplement: NIHMS1541235-supplement-6.pdf [file NIHMS1541235-supplement-6.pdf]

Supplementary figure 7

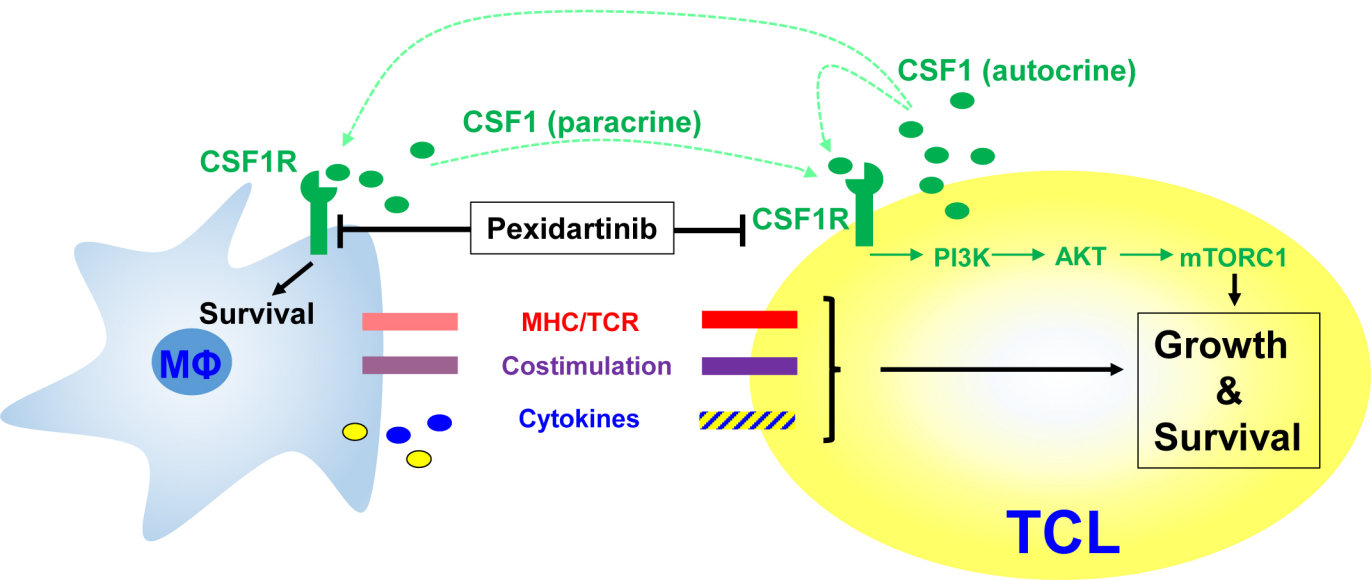

Supplement: NIHMS1541235-supplement-7.pdf [file NIHMS1541235-supplement-7.pdf]
